# Supplementary material
Source: MDPI journal article supplement (https://www.mdpi.com/2311-5637/7/3/168)
Supplement: s1 [file s1]

# **Contribution of Grape Skins and Yeast Choice on the Aroma Profiles of Wines Produced from Pinot Noir and Synthetic Grape Musts**

**Yifeng Qiao <sup>1,2</sup>, Diana Hawkins <sup>2</sup>, Katie Parish-Virtue <sup>1</sup>, Bruno Fedrizzi <sup>1</sup>, Sarah J. Knight <sup>2</sup> and Rebecca C. Deed <sup>1,2,\*</sup>**

<sup>1</sup> School of Chemical Sciences, University of Auckland, Auckland 1142, New Zealand; yqia182@aucklanduni.ac.nz (Y.Q.); kpar121@aucklanduni.ac.nz (K.P.-V.); b.fedrizzi@auckland.ac.nz (B.F.)

<sup>2</sup> School of Biological Sciences, University of Auckland, Auckland 1142, New Zealand; diana.l.hawkins@gmail.com (D.H.); s.knight@auckland.ac.nz (S.J.K.)

\* Correspondence: rebecca.deed@auckland.ac.nz; Tel.: + 64-9-3737599 (ext. 81238)

**Table S1.** Formulation of synthetic grape must (SGM) simulating Pinot noir grape juice.

| component                                                        | chemical/solution                     | concentration                |
|------------------------------------------------------------------|---------------------------------------|------------------------------|
| sugar and major components                                       | D-glucose                             | 115 g L <sup>-1</sup> *      |
|                                                                  | D-fructose                            | 115 g L <sup>-1</sup> *      |
|                                                                  | DL-malic acid                         | 3 g L <sup>-1</sup>          |
|                                                                  | citric acid                           | 0.2 g L <sup>-1</sup>        |
|                                                                  | K <sub>2</sub> HPO <sub>4</sub>       | 1.14 g L <sup>-1</sup>       |
|                                                                  | MgSO <sub>4</sub> ·7H <sub>2</sub> O  | 1.23 g L <sup>-1</sup>       |
|                                                                  | CaCl <sub>2</sub> ·2H <sub>2</sub> O  | 0.44 g L <sup>-1</sup>       |
| minerals                                                         | potassium tartrate                    | 5 g L <sup>-1</sup>          |
|                                                                  | MnCl <sub>2</sub> ·4H <sub>2</sub> O  | 198.2 µg L <sup>-1</sup>     |
|                                                                  | ZnSO <sub>4</sub> ·7H <sub>2</sub> O  | 287.5 µg L <sup>-1</sup>     |
|                                                                  | CuSO <sub>4</sub> ·5H <sub>2</sub> O  | 25.3 µg L <sup>-1</sup>      |
|                                                                  | H <sub>3</sub> BO <sub>3</sub>        | 5.7 µg L <sup>-1</sup>       |
|                                                                  | CoCl <sub>2</sub> ·6H <sub>2</sub> O  | 23.8 µg L <sup>-1</sup>      |
|                                                                  | NaMoO <sub>4</sub> ·2H <sub>2</sub> O | 24.2 µg L <sup>-1</sup>      |
|                                                                  | KIO <sub>3</sub>                      | 10.8 µg L <sup>-1</sup>      |
|                                                                  | FeSO <sub>4</sub> ·7H <sub>2</sub> O  | 70.1 µg L <sup>-1</sup>      |
|                                                                  | pyridoxine-HCl                        | 2 mg L <sup>-1</sup>         |
| vitamins                                                         | nicotinic acid                        | 2 mg L <sup>-1</sup>         |
|                                                                  | calcium pantothenate                  | 1 mg L <sup>-1</sup>         |
|                                                                  | thiamine-HCl                          | 0.5 mg L <sup>-1</sup>       |
|                                                                  | p-aminobenzoic acid                   | 1 mg L <sup>-1</sup>         |
|                                                                  | riboflavin                            | 1.2 mg L <sup>-1</sup>       |
|                                                                  | biotin                                | 0.125 mg L <sup>-1</sup>     |
|                                                                  | myo-inositol                          | 100 mg L <sup>-1</sup>       |
| amino acids and (NH <sub>4</sub> ) <sub>2</sub> HPO <sub>4</sub> | folic acid                            | 0.2 mg L <sup>-1</sup>       |
|                                                                  | L-alanine                             | 146.27 mg L <sup>-1</sup> ** |
|                                                                  | L-arginine-HCl                        | 513.52 mg L <sup>-1</sup> ** |
|                                                                  | L-aspartic acid                       | 47.91 mg L <sup>-1</sup> **  |
|                                                                  | L-asparagine                          | 6.03 mg L <sup>-1</sup> **   |
|                                                                  | L-cysteine                            | 5.19 mg L <sup>-1</sup> **   |
|                                                                  | L-glutamic acid                       | 118.24 mg L <sup>-1</sup> ** |
|                                                                  | L-glutamine                           | 91.78 mg L <sup>-1</sup> **  |
|                                                                  | L-glycine                             | 5.93 mg L <sup>-1</sup> **   |
|                                                                  | L-histidine                           | 19.74 mg L <sup>-1</sup> **  |
|                                                                  | L-isoleucine                          | 14.42 mg L <sup>-1</sup> **  |
|                                                                  | L-leucine                             | 21.21 mg L <sup>-1</sup> **  |
|                                                                  | L-lysine-HCl                          | 5.98 mg L <sup>-1</sup> **   |
|                                                                  | L-methionine                          | 5.28 mg L <sup>-1</sup> **   |
|                                                                  | L-phenylalanine                       | 15.79 mg L <sup>-1</sup> **  |
|                                                                  | L-proline                             | 300 mg L <sup>-1</sup>       |
|                                                                  | L-serine                              | 56.49 mg L <sup>-1</sup> **  |
|                                                                  | L-threonine                           | 106.64 mg L <sup>-1</sup> ** |
|                                                                  | L-tryptophan                          | 3.5 mg L <sup>-1</sup> **    |
|                                                                  | L-tyrosine                            | 7.53 mg L <sup>-1</sup> **   |

|             |                                                  |                              |
|-------------|--------------------------------------------------|------------------------------|
|             | L-valine                                         | 20.63 mg L <sup>-1</sup> **  |
|             | (NH <sub>4</sub> ) <sub>2</sub> HPO <sub>4</sub> | 185.23 mg L <sup>-1</sup> ** |
| ergosterol  | ergosterol                                       | 15 mg L <sup>-1</sup>        |
| Tween 80    | Tween 80                                         | 0.5 mL L <sup>-1</sup>       |
| glutathione | glutathione                                      | 50 mg L <sup>-1</sup>        |

\*adjusted so that the total sugars in the SGM was equivalent to the Pinot noir must used in comparable experiments.

\*\*nitrogen components adjusted based on their average concentrations in five Marlborough 2018 Pinot noir juices, with a total YAN of 300 mg L<sup>-1</sup>.

**Table S2.** Ions and retention times (RTs) used to identify aroma compounds and internal standards.

|                                | ions                    | RTs (mins) |
|--------------------------------|-------------------------|------------|
| <b>acetate esters</b>          |                         |            |
| isobutyl acetate               | 43, <b>56</b> , 73      | 9.8        |
| isoamyl acetate                | 70, 55, <b>87</b>       | 16.7       |
| ethyl phenylacetate            | 91, <b>164</b>          | 47.9       |
| $\beta$ -phenylethyl acetate   | 104, <b>43</b> , 91     | 49.2       |
| <b>alcohols, aldehydes</b>     |                         |            |
| isobutanol                     | 43, <b>41</b> , 74      | 9.3        |
| 1-butanol                      | <b>56</b> , 31, 41      | 10.9       |
| isoamyl alcohol                | 55, 42, <b>70</b>       | 14.2       |
| phenylethyl alcohol            | <b>91</b> , 92, 122     | 51.0       |
| methionol                      | <b>106</b> , 61, 58     | 41.1       |
| benzyl alcohol                 | 79, <b>43</b> , 91      | 49.2       |
| benzaldehyde                   | 77, <b>106</b> , 105    | 31.1       |
| <b>fatty acid ethyl esters</b> |                         |            |
| ethyl isobutyrate              | 43, <b>71</b> , 116, 88 | 8.8        |
| ethyl butanoate                | 71, <b>88</b> , 101     | 11.0       |
| ethyl 2-methyl butanoate       | 57, <b>102</b> , 85     | 14.5       |
| ethyl isovalerate              | <b>88</b> , 85, 115     | 13.65      |
| ethyl hexanoate                | <b>88</b> , 99, 101     | 25.1       |
| ethyl octanoate                | 88, <b>101</b> , 127    | 38.2       |
| ethyl decanoate                | <b>88</b> , 101, 155    | 51.2       |
| <b>fatty acids</b>             |                         |            |
| isobutyric acid                | <b>43</b> , 73, 88      | 39.2       |
| isovaleric acid                | <b>60</b> , 87          | 33.6       |
| hexanoic acid                  | <b>60</b> , 73, 87      | 48.5       |
| octanoic acid                  | <b>60</b> , 73, 101     | 62.0       |
| decanoic acid                  | <b>60</b> , 73, 129     | 69.0       |
| <b>cinnamates</b>              |                         |            |
| ethyl (di)hydrocinnamate       | <b>104</b> , 91, 107    | 53.7       |

|                                                               |                 |             |
|---------------------------------------------------------------|-----------------|-------------|
| ethyl cinnamate ( <i>trans</i> )                              | 131, 103, 176   | 63.88       |
| <b>C<sub>13</sub>-norisoprenoids</b>                          |                 |             |
| β-damascenone                                                 | 69, 121, 190    | 53.4        |
| α-ionone                                                      | 121, 136, 192   | 55.8        |
| β-ionone                                                      | 177, 178, 192   | 59.6        |
| <b>terpenes</b>                                               |                 |             |
| <i>cis/trans</i> -rose-oxide                                  | 139, 69, 83     | 31.93/33.07 |
| linalool                                                      | 71, 93, 121     | 36.278      |
| α-terpineol                                                   | 59, 93, 121     | 43.823      |
| β-citronellol                                                 | 69, 41, 82, 123 | 47.395      |
| nerol ( <i>cis</i> -geraniol)                                 | 69, 41, 93, 121 | 48.505      |
| geraniol ( <i>trans</i> -geraniol)                            | 69, 41, 93, 123 | 51.493      |
| <b>C<sub>6</sub>-compounds</b>                                |                 |             |
| hexanal                                                       | 44, 56, 57, 72  | 11.5        |
| <i>trans</i> -2-hexenal                                       | 41, 83, 69      | 16.5        |
| hexanol                                                       | 56, 43, 69      | 22.6        |
| <i>trans</i> -3-hexen-1-ol                                    | 41, 67, 82      | 23.597      |
| <i>cis</i> -3-hexen-1-ol                                      | 67, 41, 82      | 25.337      |
| <b>Internal standards</b>                                     |                 |             |
| ethyl butyrate-4,4,4-d <sub>3</sub>                           | 74, 89          | 10.9        |
| hexanal-d <sub>12</sub>                                       | 46, 64, 80      | 12.3        |
| 3-methylbutyl acetate-d <sub>3</sub>                          | 46, 90          | 15.35       |
| ethyl hexanoate-d <sub>11</sub>                               | 91, 110         | 23.3        |
| <i>n</i> -hexyl-2,2,3,3,4,4,5,5,6,6,6-d <sub>11</sub> alcohol | 64, 62, 76      | 23.4        |
| <i>n</i> -hexyl acetate-d <sub>3</sub>                        | 46, 56, 84      | 26.4        |
| DL-3-octanol                                                  | 59, 83, 101     | 27.8        |
| (±)-linalool-d <sub>3</sub>                                   | 74, 96, 124     | 36.187      |
| ethyl octanoate-d <sub>15</sub>                               | 91, 105         | 37.5        |
| 4-decanol                                                     | 73, 97, 115     | 41.0        |
| α-terpineol-d <sub>3</sub>                                    | 62, 139, 124    | 43.7        |
| hexanoic-d <sub>11</sub> acid                                 | 63, 77, 93      | 47.8        |
| 2-phenylethyl acetate-d <sub>3</sub>                          | 46, 91          | 49.0        |
| 3,4-dimethylphenol                                            | 107, 122        | 65.07       |

**Table S3.** Species identities of five MSPC isolates (from 96-well positions A3, B3, C3, G2 and H2) selected for Sanger sequencing to represent the three different cohorts identified for MSPC from restriction fragment length polymorphisms (RFLPs) of the ITS1-5.8S rDNA-ITS2 region. BLAST hits of each sequencing were used to identify the closest match for these isolates.

| isolate | cohort | name     | bit score | description                                                                                                                                                                               | E value | grade |
|---------|--------|----------|-----------|-------------------------------------------------------------------------------------------------------------------------------------------------------------------------------------------|---------|-------|
| A3      | 2      | MH041896 | 981.691   | <i>Saccharomyces bayanus</i> strain SF5-310-4I2 26S ribosomal RNA gene, partial sequence                                                                                                  | 0       | 100%  |
| A3      | 2      | MH041895 | 981.691   | <i>Saccharomyces uvarum</i> strain SF5-310-4II8 26S ribosomal RNA gene, partial sequence                                                                                                  | 0       | 100%  |
| A3      | 2      | LT594198 | 981.691   | <i>Saccharomyces cerevisiae</i> x <i>Saccharomyces eubayanus</i> x <i>Saccharomyces uvarum</i> genomic DNA sequence contains ITS1, 5.8S rRNA gene, ITS2, 28S rRNA gene, strain NCAIM00677 | 0       | 100%  |
| B3      | 1      | MK722474 | 887.512   | <i>Saccharomyces cerevisiae</i> strain FBKL2.8022 large subunit ribosomal RNA gene, partial sequence                                                                                      | 0       | 100%  |
| B3      | 1      | MK722467 | 887.512   | <i>Saccharomyces cerevisiae</i> strain FBKL2.8012 large subunit ribosomal RNA gene, partial sequence                                                                                      | 0       | 100%  |
| B3      | 1      | MK722464 | 887.512   | <i>Saccharomyces cerevisiae</i> strain FBKL2.8009 large subunit ribosomal RNA gene, partial sequence                                                                                      | 0       | 100%  |
| C3      | 2      | MH041896 | 972.458   | <i>Saccharomyces bayanus</i> strain SF5-310-4I2 26S ribosomal RNA gene, partial sequence                                                                                                  | 0       | 100%  |
| C3      | 2      | MH041895 | 972.458   | <i>Saccharomyces uvarum</i> strain SF5-310-4II8 26S ribosomal RNA gene, partial sequence                                                                                                  | 0       | 100%  |
| C3      | 2      | LT009475 | 972.458   | <i>Saccharomyces uvarum</i> partial 26S rRNA gene, strain VA12                                                                                                                            | 0       | 100%  |
| G2      | 3      | MK581178 | 922.598   | <i>Hanseniaspora uvarum</i> isolate FBKL2.9h702 large subunit ribosomal RNA gene, partial sequence                                                                                        | 0       | 100%  |
| G2      | 3      | MK581177 | 922.598   | <i>Hanseniaspora uvarum</i> isolate FBKL2.9696 large subunit ribosomal RNA gene, partial sequence                                                                                         | 0       | 100%  |
| G2      | 3      | MK581174 | 922.598   | <i>Hanseniaspora uvarum</i> isolate FBKL2.9633 large subunit ribosomal RNA gene, partial sequence                                                                                         | 0       | 100%  |
| H2      | 2      | MH595098 | 900.439   | <i>Saccharomyces uvarum</i> strain UCDFST:48-40 26S ribosomal RNA gene, partial sequence                                                                                                  | 0       | 100%  |
| H2      | 2      | MH041896 | 900.439   | <i>Saccharomyces bayanus</i> strain SF5-310-4I2 26S ribosomal RNA gene, partial sequence                                                                                                  | 0       | 100%  |
| H2      | 2      | MH041895 | 900.439   | <i>Saccharomyces uvarum</i> strain SF5-310-4II8 26S ribosomal RNA gene, partial sequence                                                                                                  | 0       | 100%  |

**Table S4.** Microsatellite genotypes of the 19 *S. cerevisiae* isolates from the MSPC community. NP: no peak. EC1118: *S. cerevisiae* EC1118.

| sample name/index | A1  | A5  | B9  | B12 | C5  | C10 | D3  | E2  | E6  | E9  | F5  | F8  | F11 | G3  | G6  | G7  | G10* | H3  | H7  | H <sub>2</sub> O | EC1118 |
|-------------------|-----|-----|-----|-----|-----|-----|-----|-----|-----|-----|-----|-----|-----|-----|-----|-----|------|-----|-----|------------------|--------|
| allele size       |     |     |     |     |     |     |     |     |     |     |     |     |     |     |     |     |      |     |     |                  |        |
| YGL139W - 1       | 122 | 122 | 122 | 122 | 122 | 122 | 122 | 122 | 122 | 122 | 122 | 122 | 122 | 122 | 122 | 122 | 125  | 122 | 122 | NP               | 114    |
| YGL139W - 2       | 122 | 122 | 122 | 122 | 122 | 122 | 122 | 122 | 122 | 122 | 122 | 122 | 122 | 122 | 122 | 122 | 125  | 122 | 122 | NP               | 122    |
| YLL049W - 1       | 278 | 278 | 278 | 278 | 278 | 278 | 278 | 278 | 278 | 278 | 278 | 278 | 278 | 278 | 278 | 278 | 272  | 278 | 278 | NP               | 278    |
| YLL049W - 2       | 278 | 278 | 278 | 278 | 278 | 278 | 278 | 278 | 278 | 278 | 278 | 278 | 278 | 278 | 278 | 278 | 272  | 278 | 278 | NP               | 291    |
| YBR240C - 1       | 358 | 358 | 358 | 358 | 358 | 358 | 358 | 358 | 358 | 358 | 358 | 358 | 358 | 358 | 358 | 358 | 358  | 358 | 358 | NP               | 358    |
| YBR240C - 2       | 358 | 358 | 358 | 358 | 358 | 358 | 358 | 358 | 358 | 358 | 358 | 358 | 358 | 358 | 358 | 358 | 358  | 358 | 358 | NP               | 358    |
| YPL009C - 1       | 446 | 446 | 446 | 446 | 446 | 446 | 446 | 446 | 446 | 446 | 446 | 446 | 446 | 446 | 446 | 446 | 450  | 446 | 446 | NP               | 423    |
| YPL009C - 2       | 446 | 446 | 446 | 446 | 446 | 446 | 446 | 446 | 446 | 446 | 446 | 446 | 446 | 446 | 446 | 446 | 450  | 446 | 446 | NP               | 434    |
| MAT $\alpha$ - 1  | 457 | 457 | 457 | 457 | 457 | 457 | 457 | 457 | 457 | 457 | 457 | 457 | 457 | 457 | 457 | 457 | 461  | 457 | 457 | NP               | 457    |
| YFR028C - 1       | 156 | 156 | 156 | 156 | 156 | 156 | 156 | 156 | 156 | 156 | 156 | 156 | 156 | 156 | 156 | 156 | 156  | 156 | 156 | NP               | 122    |
| YFR028C - 2       | 156 | 156 | 156 | 156 | 156 | 156 | 156 | 156 | 156 | 156 | 156 | 156 | 156 | 156 | 156 | 156 | 156  | 156 | 156 | NP               | 132    |
| YOL109W - 1       | 260 | 260 | 260 | 260 | 260 | 260 | 260 | 260 | 260 | 260 | 260 | 260 | 260 | 260 | 260 | 260 | 260  | 260 | 260 | NP               | 311    |
| YOL109W - 2       | 260 | 260 | 260 | 260 | 260 | 260 | 260 | 260 | 260 | 260 | 260 | 260 | 260 | 260 | 260 | 260 | 260  | 260 | 260 | NP               | 311    |
| MAT $\alpha$ - 1  | 481 | 481 | 481 | 481 | 481 | 481 | 480 | 481 | 481 | 481 | 481 | 481 | 480 | 480 | 481 | 481 | 480  | 481 | 481 | NP               | 481    |
| YGL014W - 1       | 146 | 146 | 146 | 146 | 146 | 146 | 146 | 146 | 146 | 146 | 146 | 146 | 146 | 146 | 146 | 146 | 146  | 146 | 146 | NP               | 139    |
| YGL014W - 2       | 146 | 146 | 146 | 146 | 146 | 146 | 146 | 146 | 146 | 146 | 146 | 146 | 146 | 146 | 146 | 146 | 146  | 146 | 146 | NP               | 146    |
| YML091C - 1       | 290 | 290 | 290 | 290 | 290 | 290 | 290 | 290 | 290 | 290 | 290 | 290 | 290 | 290 | 290 | 290 | 290  | 290 | 290 | NP               | 270    |
| YML091C - 2       | 290 | 290 | 290 | 290 | 290 | 290 | 290 | 290 | 290 | 290 | 290 | 290 | 290 | 290 | 290 | 290 | 290  | 290 | 290 | NP               | 318    |
| YDR160W - 1       | 393 | 393 | 393 | 393 | 393 | 393 | 393 | 393 | 393 | 393 | 393 | 393 | 393 | 393 | 393 | 393 | 393  | 393 | 393 | NP               | 389    |
| YDR160W - 2       | 393 | 393 | 393 | 393 | 393 | 393 | 393 | 393 | 393 | 393 | 393 | 393 | 393 | 393 | 393 | 393 | 393  | 393 | 393 | NP               | 484    |

\*data acquired from a second run under the same protocol.

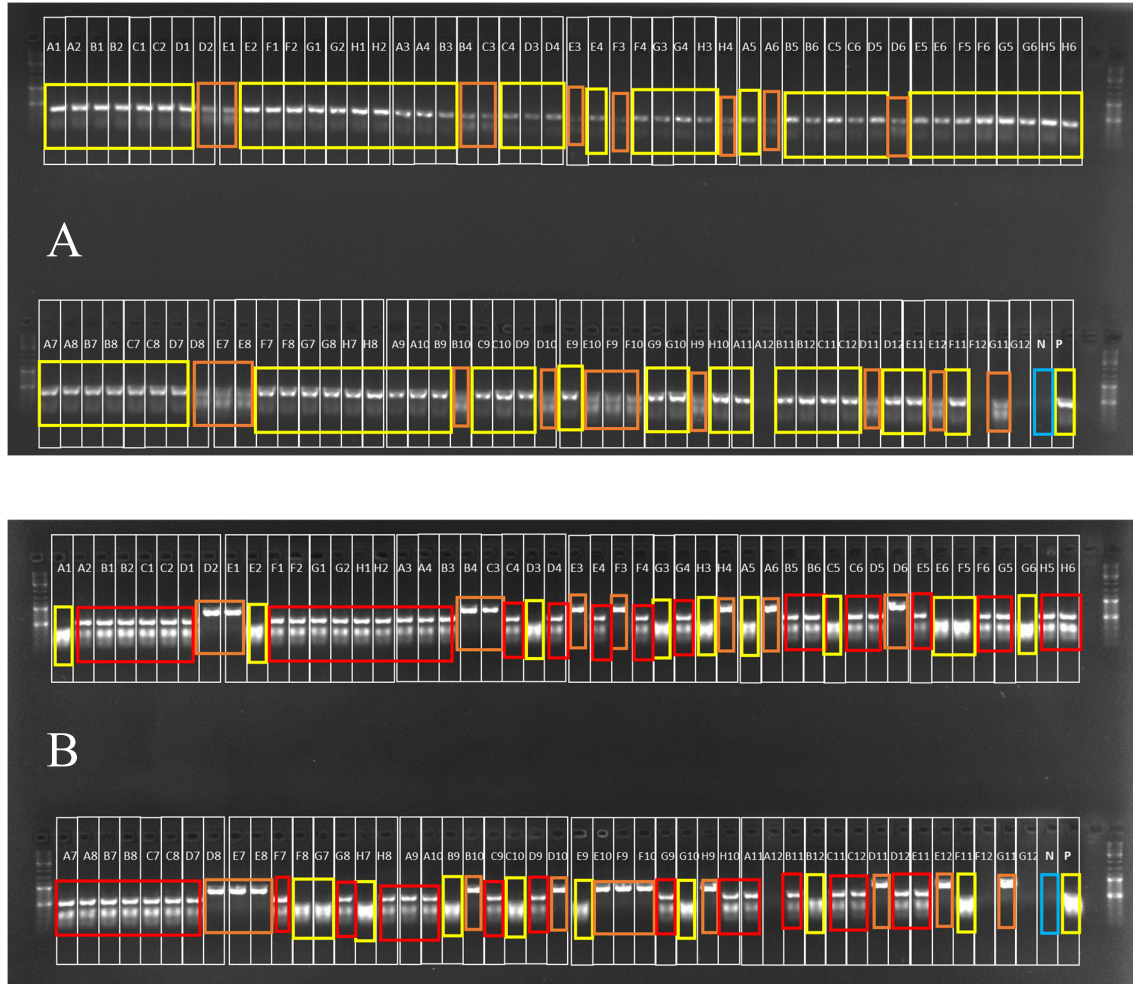

**Figure S1.** Cohort determination of the MSPC single vineyard community using the amplification of the ITS1-5.8S rDNA-ITS2 region, followed by RFLP analysis using *HinfI* (A) and *HaeIII* (B). The 1 kb+ ladder is shown to the left and right of all lanes. N = negative control (no DNA) surrounded by a blue box. P = *S. cerevisiae* positive control. Yellow boxes around *HinfI* and *HaeIII* digests represent cohort 1, *Saccharomyces cerevisiae*. Yellow *HinfI* and red *HaeIII* boxes represent cohort 2, *Saccharomyces uvarum*. Orange *HinfI* and *HaeIII* boxes represent cohort 3, *Hanseniaspora uvarum*.

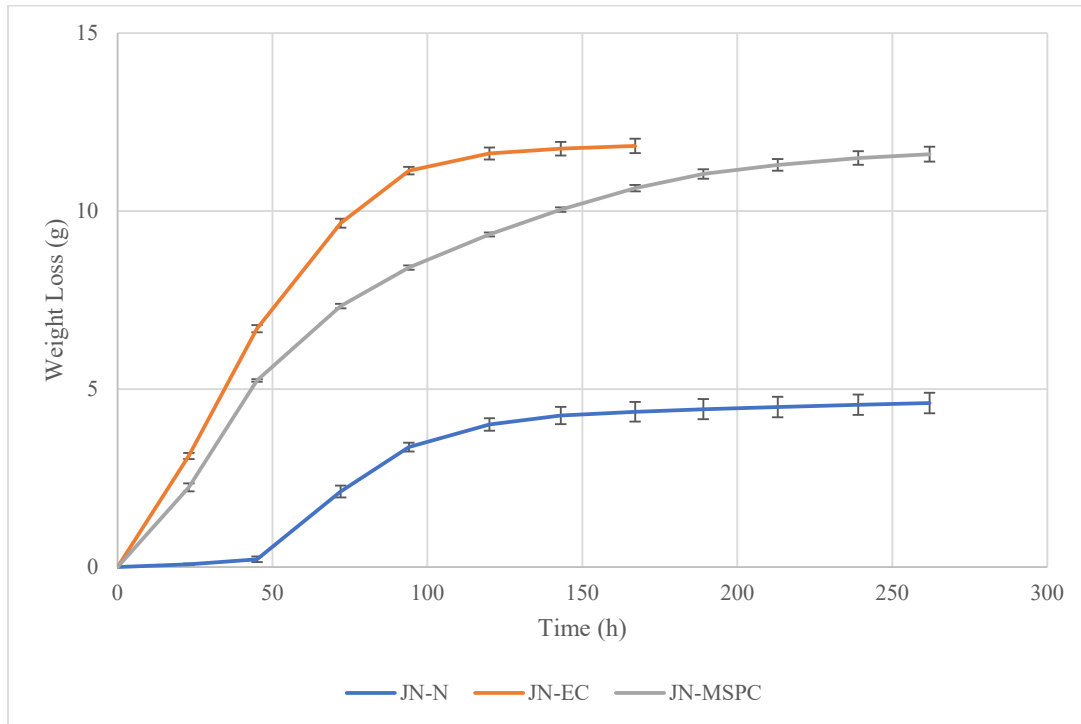

**Figure S2.** Cumulative weight loss (g) over time (h) of fermentations in Pinot noir juice without grape skins (JN). N = no inoculation, EC = inoculation of *S. cerevisiae* EC1118, MSPC = inoculation of the MSPC yeast community. Error bars represent the 95% confidence intervals, (n = 3).

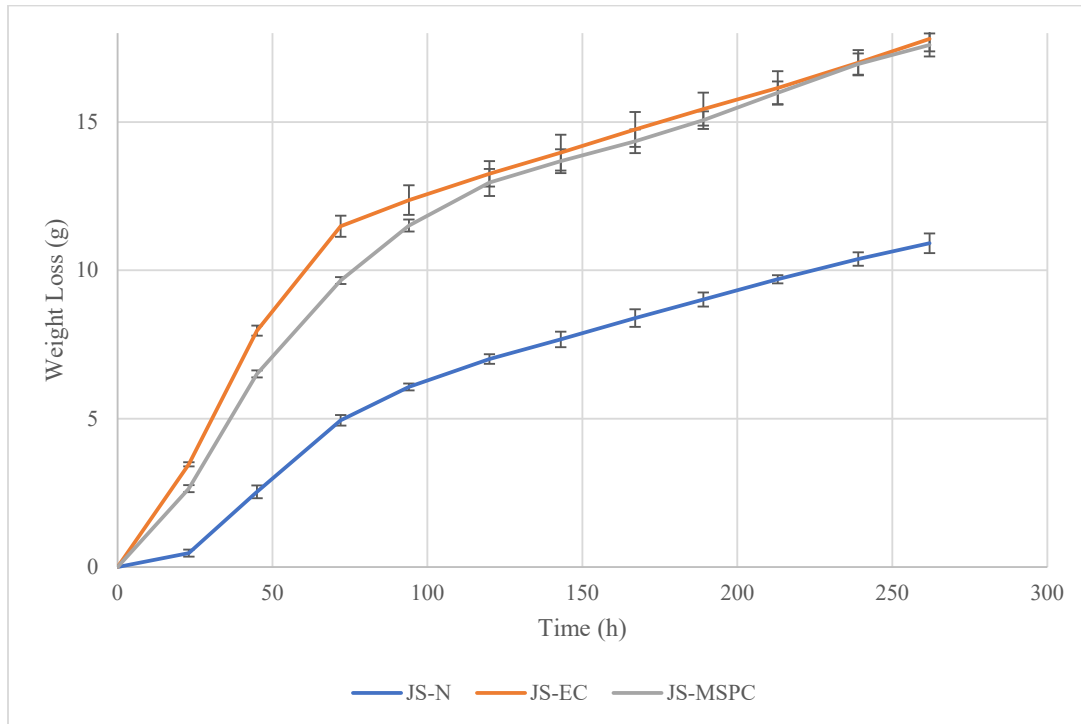

**Figure S3.** Cumulative weight loss (g) over time (h) of fermentations in Pinot noir juice with grape skins (JS). N = no inoculation, EC = inoculation of *S. cerevisiae* EC1118, MSPC = inoculation of the MSPC yeast community. Error bars represent the 95% confidence intervals, (n = 3).

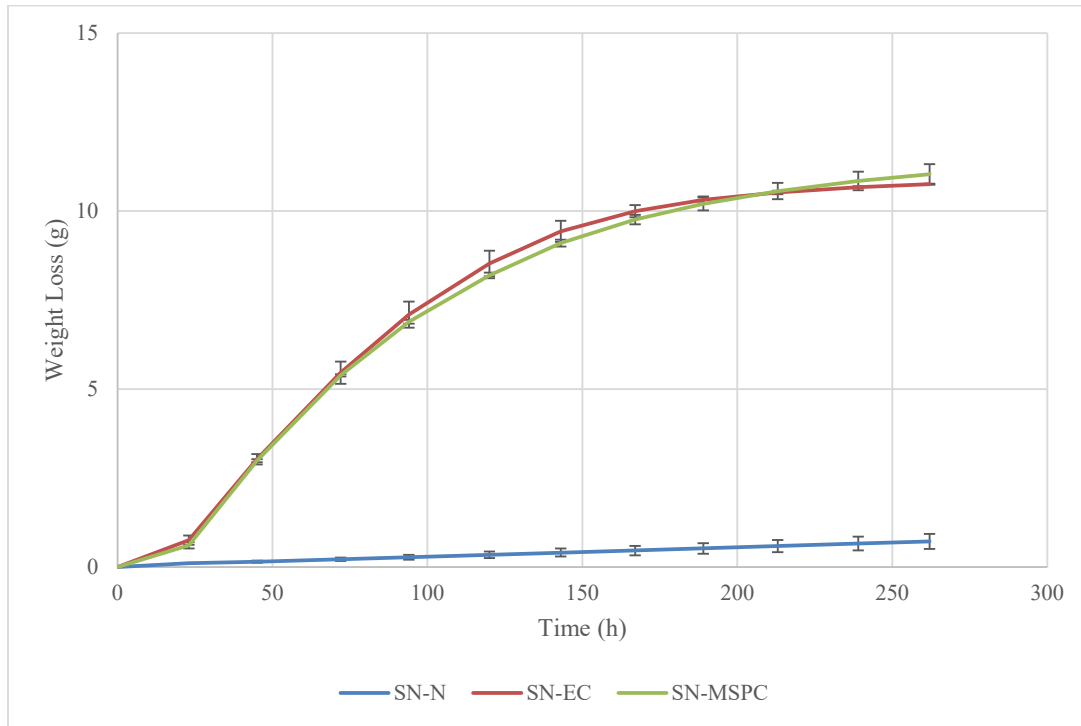

**Figure S4.** Cumulative weight loss (g) over time (h) of fermentations in synthetic grape medium (SGM) without grape skins (SN). N = no inoculation, EC = inoculation of *S. cerevisiae* EC1118, MSPC = inoculation of the MSPC yeast community. Error bars represent the 95% confidence intervals, (n = 3).

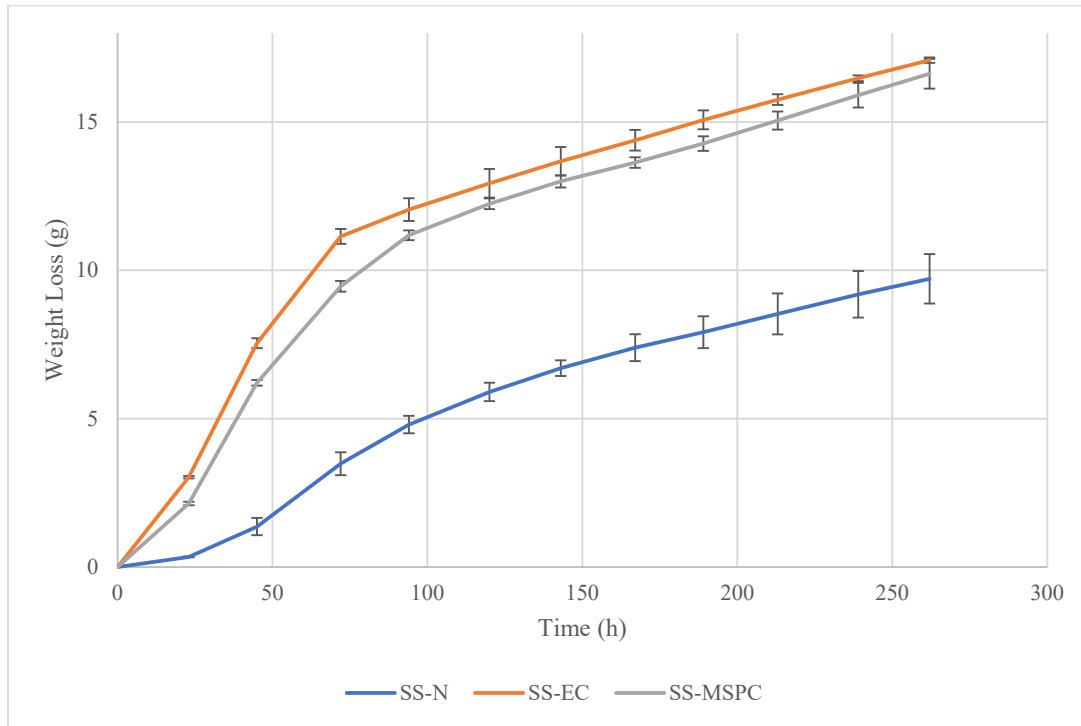

**Figure S5.** Cumulative weight loss (g) over time (h) of fermentations in synthetic grape medium (SGM) with grape skins (SS). N = no inoculation, EC = inoculation of *S. cerevisiae* EC1118, MSPC = inoculation of the MSPC yeast community. Error bars represent the 95% confidence intervals, (n = 3).
